# Supplementary material
Source: bioRxiv or medRxiv preprint supplement (https://www.biorxiv.org/highwire/filestream/55293/field_highwire_adjunct_files/1/037762-2.pdf)
Supplement: Supplementary file [file 037762-2.pdf]

Supplementary Table 2. Ninety-six indexes for A-idx-i5 primers.

| Index | Sequence  |
|-------|-----------|
| i5_1  | TAATGTGG  |
| i5_2  | GCACTCAG  |
| i5_3  | AACAGCGG  |
| i5_4  | CCATATGA  |
| i5_5  | TGGAAAGC  |
| i5_6  | AGCAACGC  |
| i5_7  | CCCTTGCA  |
| i5_8  | CCCTCTTG  |
| i5_9  | TTCGAGCC  |
| i5_10 | AGTAGTTA  |
| i5_11 | AGAAAGTG  |
| i5_12 | TGCCGGTA  |
| i5_13 | GCAAAC TG |
| i5_14 | GGTTGAGA  |
| i5_15 | ATAGATGT  |
| i5_16 | CAAACATT  |
| i5_17 | CTGAGCGT  |
| i5_18 | TAGTCTCT  |
| i5_19 | AGACGAGG  |
| i5_20 | ACAAAGAT  |
| i5_21 | ATGGGCTC  |
| i5_22 | CCGTCTTA  |
| i5_23 | ACCCGATT  |
| i5_24 | TTAGCAAT  |
| i5_25 | CGTGTGTT  |
| i5_26 | GTAAACAA  |
| i5_27 | TGTTCGCT  |
| i5_28 | ATGTGCCG  |
| i5_29 | TGAATAGG  |
| i5_30 | GGAACGAA  |
| i5_31 | TCGCAATC  |
| i5_32 | AGCACGTA  |
| i5_33 | TGGACGGA  |
| i5_34 | CAGATGGG  |
| i5_35 | CTCCCAA   |
| i5_36 | ACCAAGGG  |
| i5_37 | AAGCTCCT  |
| i5_38 | GAAATACG  |
| i5_39 | AAACCGCC  |
| i5_40 | AACTCAGT  |
| i5_41 | ACATGGAC  |

|       |          |
|-------|----------|
| i5_42 | GCTAAGTT |
| i5_43 | ACGGAGCA |
| i5_44 | TTTGGCAT |
| i5_45 | TTAACGTT |
| i5_46 | ACGGCAGT |
| i5_47 | GGAAGTCC |
| i5_48 | ACCAACCC |
| i5_49 | AAGAACAG |
| i5_50 | ACGAATTC |
| i5_51 | AATGGCGT |
| i5_52 | GAGGAGTG |
| i5_53 | TGGTTAAC |
| i5_54 | GTTGTCCG |
| i5_55 | CCCTGTTT |
| i5_56 | CCCGTTCT |
| i5_57 | TTTGTACA |
| i5_58 | GGAAGTGA |
| i5_59 | GCCTTGTG |
| i5_60 | AACAAATG |
| i5_61 | GGCTTTGC |
| i5_62 | TTTCAGGT |
| i5_63 | AGCGTGGT |
| i5_64 | GAAGATAT |
| i5_65 | GTTCTGCT |
| i5_66 | TACCTCCC |
| i5_67 | TTGCTCTA |
| i5_68 | TCCCTGGA |
| i5_69 | GACACCTG |
| i5_70 | ACTTCGCT |
| i5_71 | GATTAAAG |
| i5_72 | GATTGGGA |
| i5_73 | GGGCATCA |
| i5_74 | GGCCAAT  |
| i5_75 | CCTCATGA |
| i5_76 | ATTTCCAT |
| i5_77 | TCAAATGG |
| i5_78 | CTACGGGA |
| i5_79 | CGATGGCA |
| i5_80 | ACGGTTGG |
| i5_81 | TCATACCA |
| i5_82 | TAGGTACG |
| i5_83 | GAGGGTCA |
| i5_84 | TATCCACG |
| i5_85 | CGTGCAAC |

|       |          |
|-------|----------|
| i5_86 | CGTTTCGT |
| i5_87 | AAGTCGGG |
| i5_88 | TGGCTAGT |
| i5_89 | AGTTGCGG |
| i5_90 | ATCCTAGT |
| i5_91 | TCATTTCA |
| i5_92 | ACAGGCCA |
| i5_93 | AAGTCCAA |
| i5_94 | GGAGTAAG |
| i5_95 | CAAGGTAC |
| i5_96 | AATCCGGC |
